# Supplementary material
Source: Springer Nature journal article supplement (https://www.springerprofessional.de/resource/supplementary/13638_2014_956_MOESM7_ESM.pdf/11898854)

**X**

**Z**

**Y**

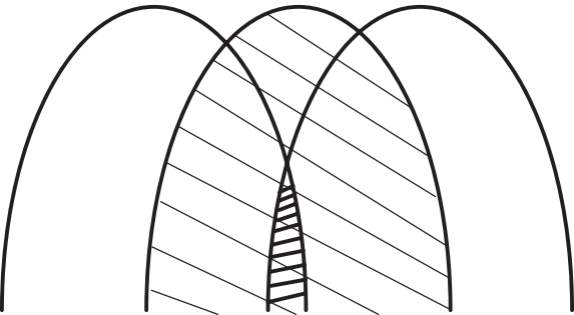

Supplement: MOESM7 [file 11898854]
